# Supplementary material for: The anti-arthritis effect of sulforaphane, an activator of Nrf2, is associated with inhibition of both B cell differentiation and the production of inflammatory cytokines
Source: PubMed Central journal article supplement (PMC7886167; doi:10.1371/journal.pone.0245986), 2021-02-16

**A**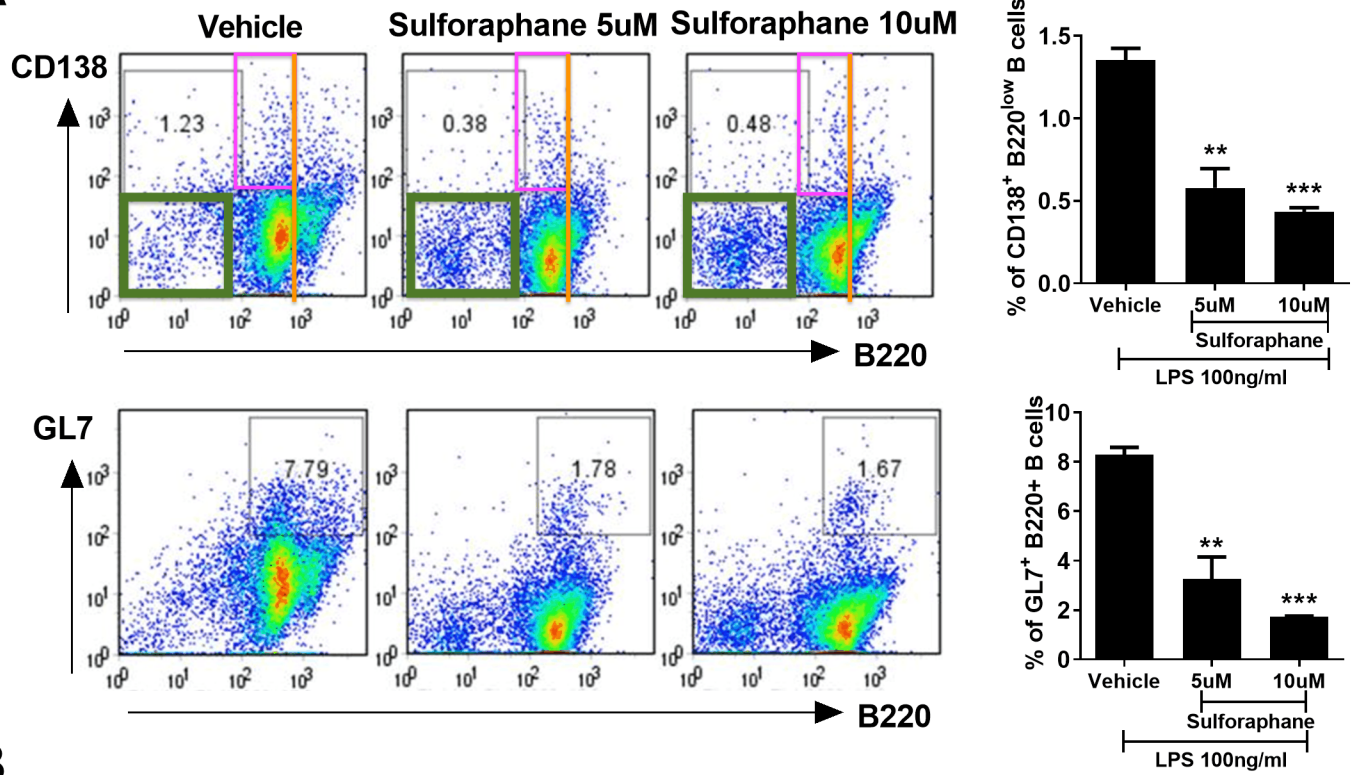**B**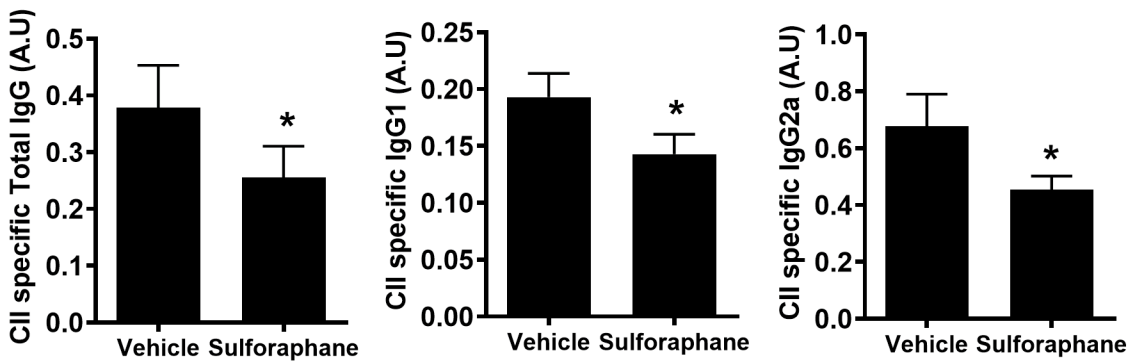

Supplement: pone.0245986.s002.pdf [file pone.0245986.s002.pdf]
